# Supplementary material for: Retention and mitigation of metals in sediment, soil, water, and plant of a newly constructed root-channel wetland (China) from slightly polluted source water
Source: PubMed Central journal article supplement (PMC4094763; doi:10.1186/2193-1801-3-326), 2014-06-28

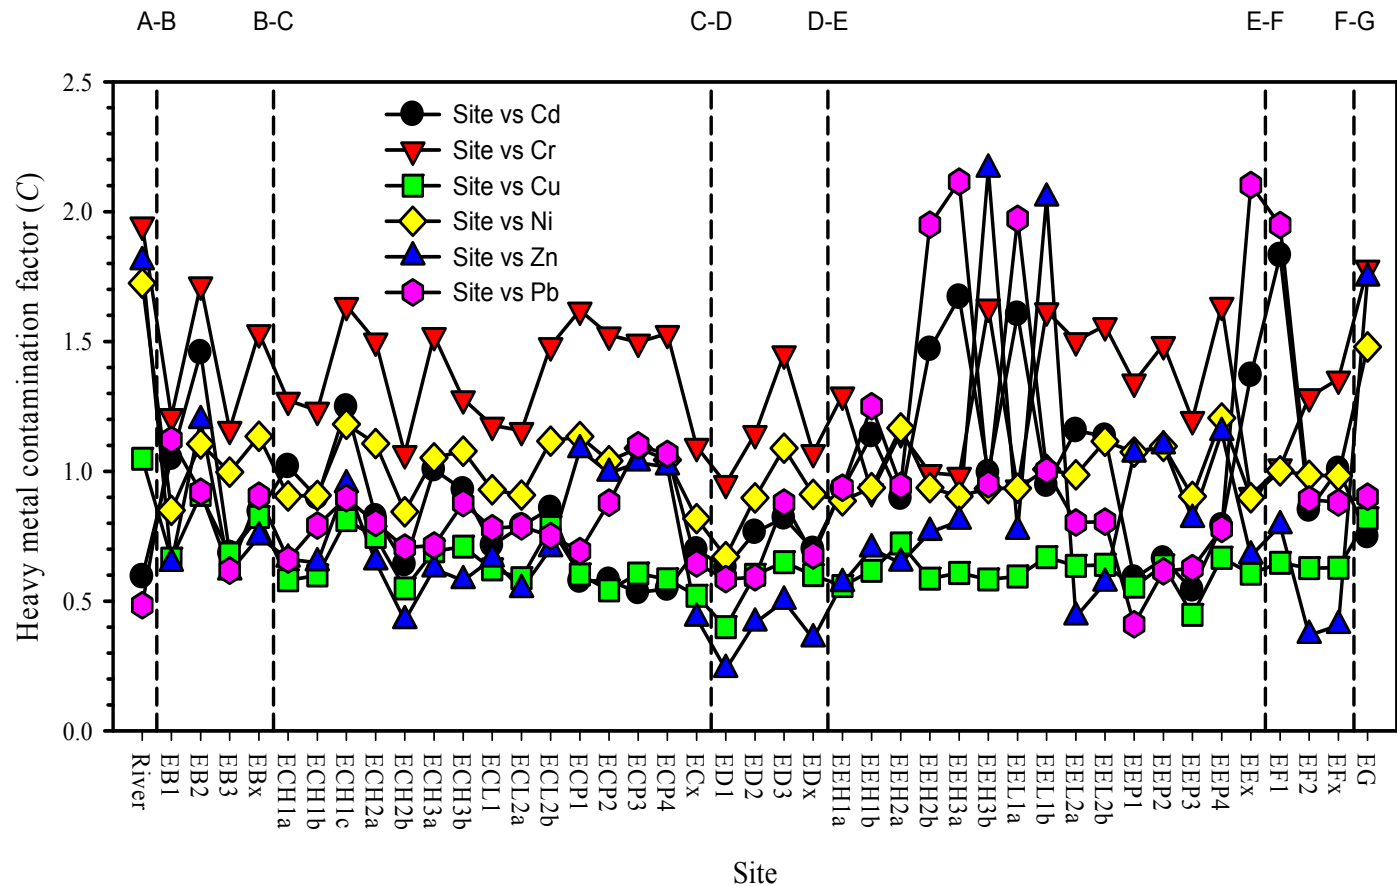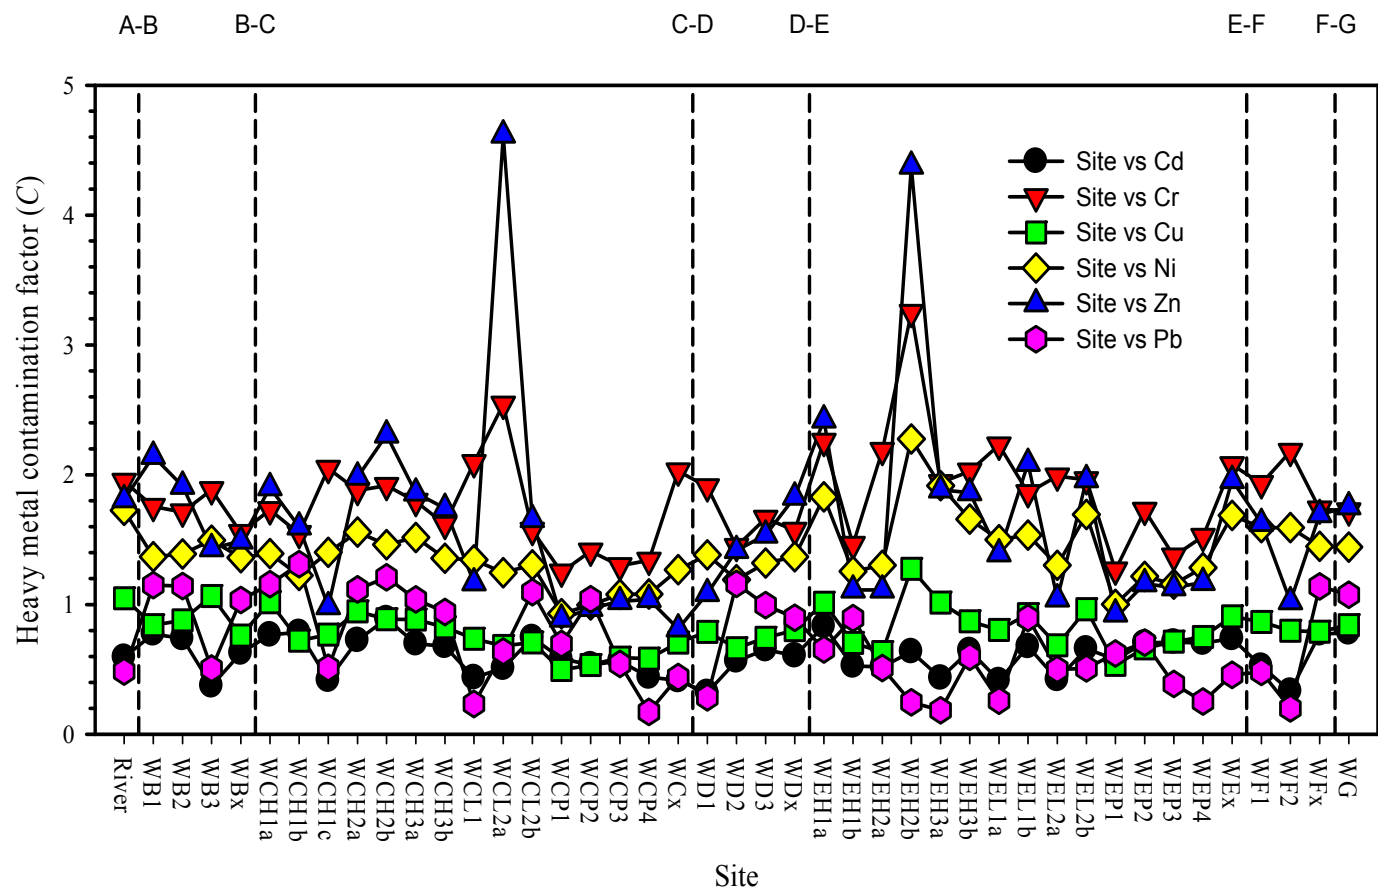

Supplement: 40064_2014_1040_MOESM4_ESM.pdf [file 40064_2014_1040_MOESM4_ESM.pdf]
